# Supplementary material for: New opportunities in acquisition and analysis of natural abundance complex solid-state 33S MAS NMR spectra: (CH3NH3)2WS4
Source: Royal Society of Chemistry journal article supplement (doi:10.1039/b904841n), 2009-01-01
Supplement: b904841n.pdf [file b904841n.pdf]

## New Opportunities in Acquisition and Analysis of Natural Abundance

### Complex Solid-State $^{33}\text{S}$ MAS NMR Spectra: $(\text{CH}_3\text{NH}_3)_2\text{WS}_4$

Hans J. Jakobsen,\*<sup>a</sup> Henrik Bildsøe,<sup>a</sup> Jørgen Skibsted,<sup>a</sup> Michael Brorson,<sup>b</sup>  
Bikshandarkoil R. Srinivasan,<sup>c</sup> Christian Näther<sup>d</sup> and Wolfgang Bensch<sup>d</sup>

<sup>a</sup> *Instrument Centre for Solid-State NMR Spectroscopy*

*Department of Chemistry, Aarhus University, DK-8000 Aarhus C, Denmark*

<sup>b</sup> *Haldor Topsøe A/S, Nymøllevej 55, DK-2800 Lyngby, Denmark*

<sup>c</sup> *Department of Chemistry, Goa University, Goa 403206, India*

<sup>d</sup> *Institut für Anorganische Chemie, Universität Kiel, D-24098 Kiel, Germany*

e-mail: [hja@chem.au.dk](mailto:hja@chem.au.dk)

### Electronic Supplementary Information

#### Contents

|                                                                                                                                                                                    |         |
|------------------------------------------------------------------------------------------------------------------------------------------------------------------------------------|---------|
| Differences in Crystal Structures for $(\text{CH}_3\text{NH}_3)_2\text{WS}_4$ and $(\text{NH}_4)_2\text{WS}_4$ from X-Ray Diffraction .....                                        | page S2 |
| Comparison of the $^{33}\text{S}$ Chemical Shift Tensors with the $^{77}\text{Se}$ and $^{17}\text{O}$ Tensors for $(\text{NH}_4)_2\text{WSe}_4$ and $\text{K}_2\text{WO}_4$ ..... | page S6 |
| References .....                                                                                                                                                                   | page S9 |

### Differences in Crystal Structures for $(\text{CH}_3\text{NH}_3)_2\text{WS}_4$ and $(\text{NH}_4)_2\text{WS}_4$ from X-Ray Diffraction

The environments of S atoms as determined from X-ray diffraction studies of the crystal structure for the two compounds  $(\text{CH}_3\text{NH}_3)_2\text{WS}_4^1$  and  $(\text{NH}_4)_2\text{WS}_4^2$  are illustrated below. Note that the numbering scheme has been chosen on the basis of the crystal structure of  $(\text{CH}_3\text{NH}_3)_2\text{WS}_4$  [1].

Some further information:

#### $(\text{CH}_3\text{NH}_3)_2\text{WS}_4$ , space group *Pnma*

Bond distances (Å): W-S1: 2.1862(13), W-S2: 2.199(2), W-S3: 2.2010(18)

Bond angles: S1-W-S1: 108.46(7), S1-W-S2: 108.62(5), S1-W-S3: 110.45(5), S2-W-S3: 110.18(8)

Eight S...H contacts (neglecting two C-H...S) with N-S separations between 3.227(7) and 3.562(1) Å, and corresponding N-H...S angles ranging from 121 to 152°.

#### $(\text{NH}_4)_2\text{WS}_4$ , space group *Pnma*

Bond distances (Å): W-S1: 2.1870(7), W-S2: 2.1856(11), W-S3: 2.2090(10)

Bond angles: S2-W-S1 109.25(3), S1-W-S1 108.23(4), S2-W-S3 110.33(4), S1-W-S3 109.87(2)

Thirteen S...H contacts with N-S separations between 3.242(4) and 3.633(4) Å, corresponding angles: 118 – 149°.

In the following figures the environments of the different S atoms are shown. S-W bonds are neglected. Note that in all drawings the lines between the atoms do not indicate direct bonding interactions. They are drawn for a better visualization of the environments and their changes going from  $(\text{NH}_4)_2\text{WS}_4$  to  $(\text{CH}_3\text{NH}_3)_2\text{WS}_4$ .

These figures support the assignment of the S-sites to the  $^{33}\text{S}$  MAS NMR signals, i.e., the S2 atom is most affected when one H atom is substituted by a  $\text{CH}_3$  group.

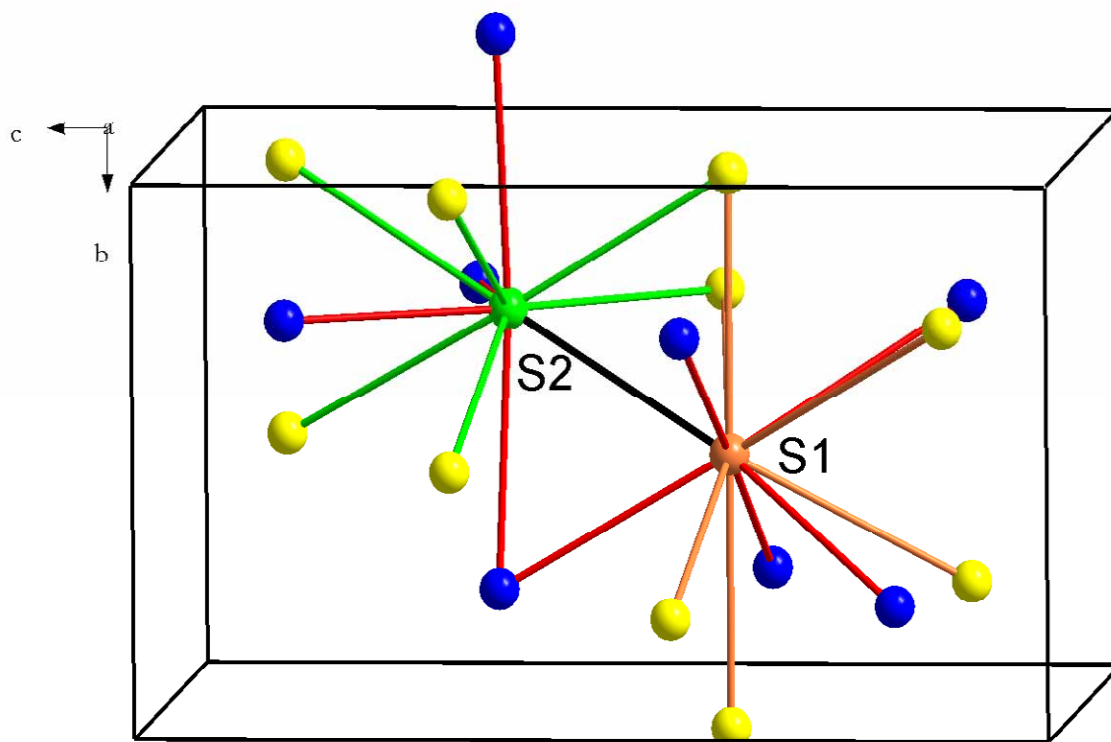

The environment around the S1 and S2 atoms in the structure of  $(\text{NH}_4)_2\text{WS}_4$ .

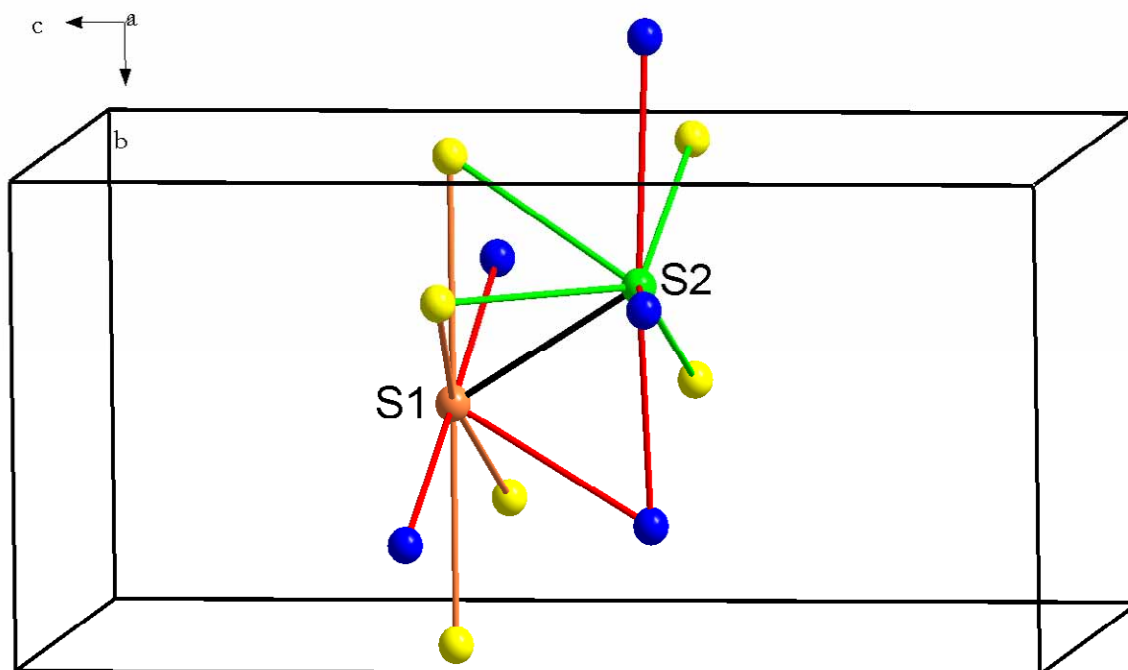

The environment around the S1 and S2 atoms in the structure of  $(\text{CH}_3\text{NH}_3)_2\text{WS}_4$ .

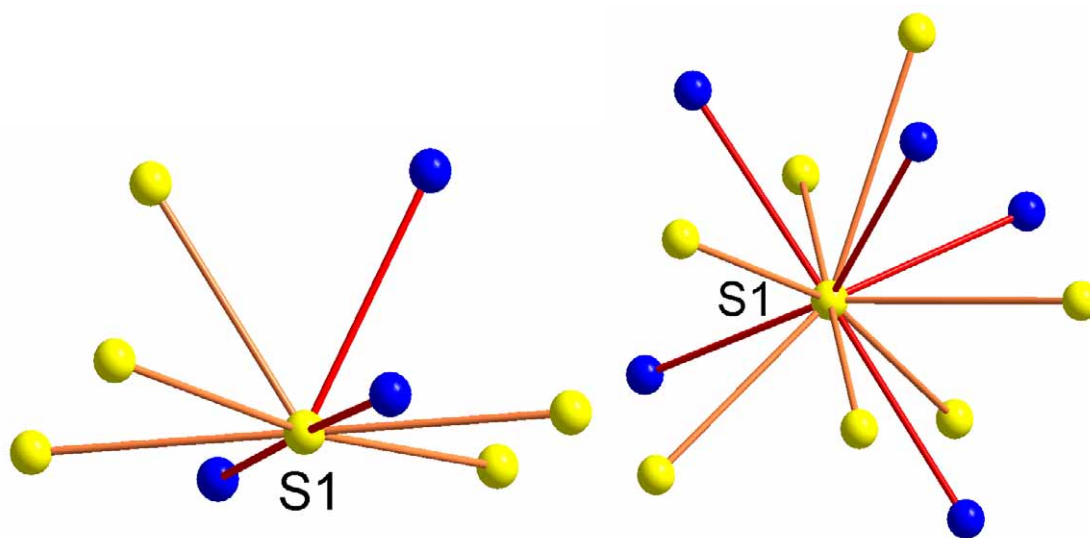

S1 environment in the  $(\text{CH}_3\text{NH}_3)_2\text{WS}_4$  compound (left) and in  $(\text{NH}_4)_2\text{WS}_4$  (right)

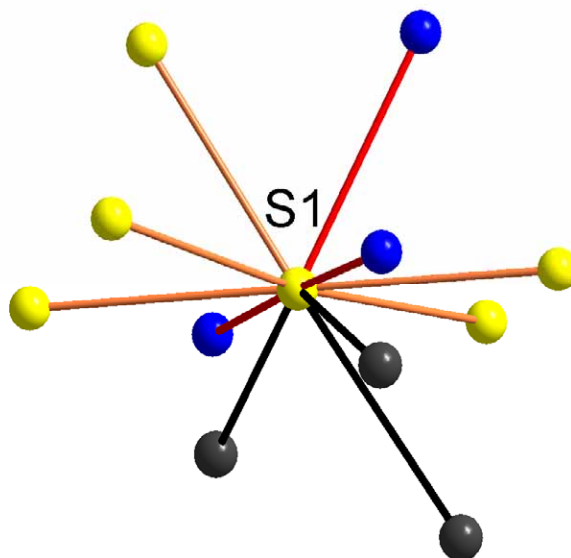

S1 in  $(\text{CH}_3\text{NH}_3)_2\text{WS}_4$  including S-C contacts up to 4 Å

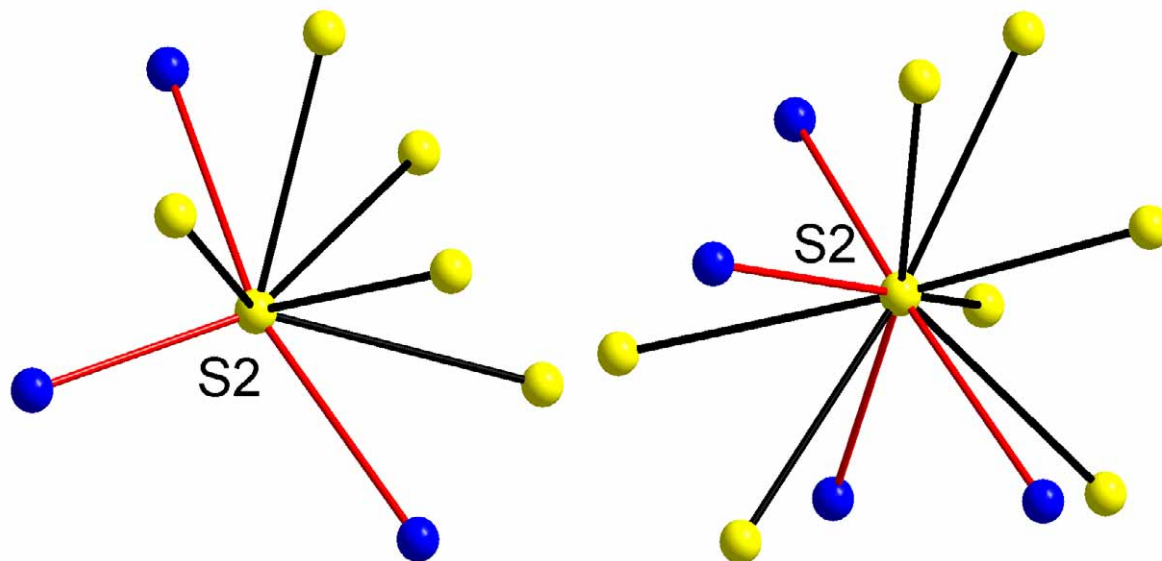

S2 in (CH<sub>3</sub>NH<sub>3</sub>)<sub>2</sub>WS<sub>4</sub> (left) and in (NH<sub>4</sub>)<sub>2</sub>WS<sub>4</sub> (right)

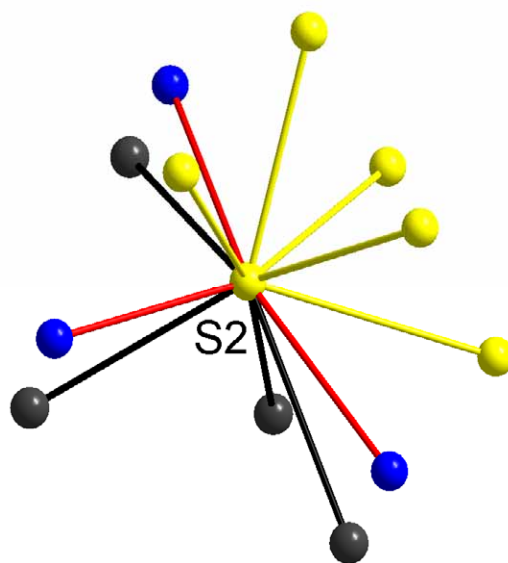

S2 in (CH<sub>3</sub>NH<sub>3</sub>)<sub>2</sub>WS<sub>4</sub> with C atoms up to 4 Å

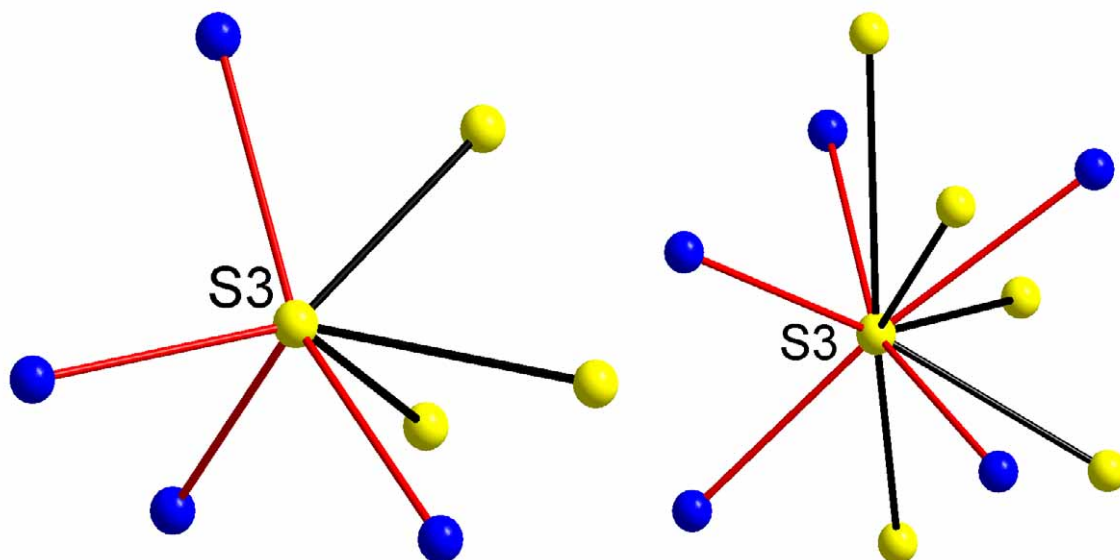

S3 in  $(\text{CH}_3\text{NH}_3)_2\text{WS}_4$  (left) and in  $(\text{NH}_4)_2\text{WS}_4$  (right)

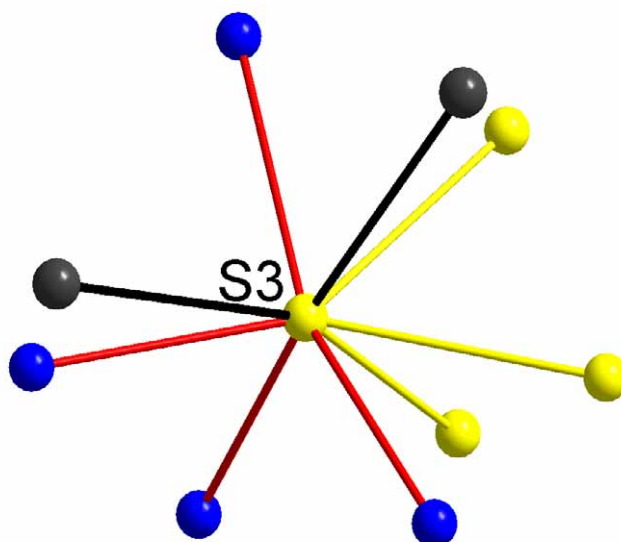

S3 in  $(\text{CH}_3\text{NH}_3)_2\text{WS}_4$  with C up to 4 Å

### Comparison of the $^{33}\text{S}$ chemical shift tensors with the $^{77}\text{Se}$ and $^{17}\text{O}$ tensors for $(\text{NH}_4)_2\text{WSe}_4$ and $\text{K}_2\text{WO}_4$

It is of interest to compare the anisotropic and isotropic  $^{33}\text{S}$  chemical shift parameters (and their assignments) for the three nonequivalent S atoms in the  $\text{WS}_4^{2-}$  ion of (I) and (II) determined in the present study with the corresponding parameters recently reported for the three nonequivalent  $^{77}\text{Se}$  (spin  $I = 1/2$ ) atoms in the  $\text{WSe}_4^{2-}$  ion of  $(\text{NH}_4)_2\text{WSe}_4$ ,<sup>3</sup> which is isostructural ( $Pnma$ )<sup>4</sup> with (I) and (II). In this report<sup>3</sup> the  $^{77}\text{Se}$  chemical shift tensors are presented using the convention of principal

axis components ( $\delta_{xx}$ ,  $\delta_{yy}$ ,  $\delta_{zz}$ ) of the tensors. For a convenient comparison of these data with the parameters listed for (I) and (II) in Table 1 of this work, we have converted these principal axis components for the tensors to the representation used here ( $\delta_\sigma$ ,  $\eta_\sigma$ ,  $\delta_{\text{iso}}$ ) employing the definitions given in the Experimental Section, Eqs. (1) – (4), of the full article. The converted data are summarized below in Table 1 of this Supporting Information along with the parameters for (I) and (II). Most importantly, this has allowed us to assign the experimental data reported for  $(\text{NH}_4)_2\text{WSe}_4$  in rows **15b** and **15c** of Table 3 in reference<sup>3</sup> to the Se(3) and Se(2) sites,

**Table 1.** Comparison of the chemical shift anisotropic and isotropic parameters ( $\delta_\sigma$ ,  $\eta_\sigma$ ,  $\delta_{\text{iso}}$ ) for  $^{33}\text{S}$  in  $(\text{CH}_3\text{NH}_3)_2\text{WS}_4$  (I) and  $(\text{NH}_4)_2\text{WS}_4$  (II) determined in the present study with the corresponding  $^{77}\text{Se}$  and  $^{17}\text{O}$  parameters earlier reported for  $(\text{NH}_4)_2\text{WSe}_4$ <sup>3</sup> and  $\text{K}_2\text{WO}_4$ ,<sup>6</sup> respectively (see text).

| Compound/sites                              | $\delta_\sigma$<br>(ppm) | $\eta_\sigma$ | $\delta_{\text{iso}}$<br>(ppm) | Ref.      |
|---------------------------------------------|--------------------------|---------------|--------------------------------|-----------|
| $(\text{CH}_3\text{NH}_3)_2\text{WS}_4$ (I) |                          |               |                                |           |
| S(1,1)                                      | 401                      | 0.11          | 545.3                          | This work |
| S(2)                                        | 344                      | 0.10          | 473.1                          | –         |
| S(3)                                        | 383                      | 0.25          | 491.5                          | –         |
| $(\text{NH}_4)_2\text{WS}_4$ (II)           |                          |               |                                |           |
| S(1,1)                                      | 389                      | 0.16          | 542.3                          | 5         |
| S(2)                                        | 380                      | 0.05          | 495.8                          | –         |
| S(3)                                        | 396                      | 0.35          | 518.7                          | –         |
| $(\text{NH}_4)_2\text{WSe}_4$               |                          |               |                                |           |
| Se(1,1)                                     | 926 (398) <sup>a</sup>   | 0.03          | 1338 (562) <sup>b</sup>        | 3         |
| Se(2)                                       | 864 (372) <sup>a</sup>   | 0.01          | 1155 (485) <sup>b</sup>        | –         |
| Se(3)                                       | 892 (384) <sup>a</sup>   | 0.32          | 1256 (527) <sup>b</sup>        | –         |
| $\text{K}_2\text{WO}_4$                     |                          |               |                                |           |
| O(1,1)                                      | 220                      | 0.15          | 437                            | 6         |
| O(2)                                        | 214                      | 0.30          | 422                            | –         |
| O(3)                                        | 227                      | 0.22          | 429                            | –         |

<sup>a</sup> Value in parenthesis is the experimental value scaled by a factor of 0.43 (see text).

<sup>b</sup> Value in parenthesis is the experimental value scaled by a factor of 0.42 (see text).

respectively, as reported in the crystal structure work.<sup>4</sup> These sites are identical to the convention used for the S(3) and S(2) sites in the crystal structure of (I)<sup>1</sup> and thus for both (I) and (II) in Table 1. With this assignment it is seen from Table 1 that not only the <sup>77</sup>Se isotropic chemical shifts ( $\delta_{\text{iso}}$ ) but also the highly precise <sup>77</sup>Se chemical shift anisotropy (CSA) parameters ( $\delta_{\sigma}$  and  $\eta_{\sigma}$ ) for (NH<sub>4</sub>)<sub>2</sub>WSe<sub>4</sub> follow the same order as do these parameters for the S(1,1), S(2), and S(3) sites in (I) and (II), except for S(3) in (II) for which the  $\delta_{\sigma}$  value is slightly larger than  $\delta_{\sigma}$  for S(1,1). For (NH<sub>4</sub>)<sub>2</sub>WSe<sub>4</sub> we note that the three  $\delta_{\sigma}$ (<sup>77</sup>Se) values are about a factor 2 larger than the corresponding <sup>33</sup>S values for (I) and (II), in agreement with the general observation of a larger span in chemical shift for the heavier atom. To obtain a "closer" comparison of the <sup>33</sup>S and <sup>77</sup>Se parameters ( $\delta_{\sigma}$  and  $\delta_{\text{iso}}$ ) for (NH<sub>4</sub>)<sub>2</sub>WS<sub>4</sub> (II) and (NH<sub>4</sub>)<sub>2</sub>WSe<sub>4</sub> we have calculated scaling factors for  $\delta_{\sigma}$ (<sup>77</sup>Se) and  $\delta_{\text{iso}}$ (<sup>77</sup>Se) by taking ratios of the average values for the three  $\delta_{\sigma}$  and  $\delta_{\text{iso}}$  values for the two compounds. For  $\delta_{\sigma}$ (<sup>77</sup>Se) this gives a scaling factor of 0.43 and for  $\delta_{\text{iso}}$ (<sup>77</sup>Se) a scaling factor of 0.42 is obtained. The corresponding calculated "reduced  $\delta_{\sigma}$ (<sup>77</sup>Se)" and "reduced  $\delta_{\text{iso}}$ (<sup>77</sup>Se)" values are shown in parentheses in Table 1 next to the real values. These values show good similarities with the values for the corresponding <sup>33</sup>S parameters in (I) and (II).

Finally, following the comparison of the <sup>77</sup>Se and <sup>33</sup>S chemical shift parameters, it also seems of interest to extend the comparison to the 25-years old <sup>17</sup>O isotropic and anisotropic chemical shift data determined for this quadrupole (spin  $I = 5/2$ ) in a sample of <sup>17</sup>O-enriched K<sub>2</sub>WO<sub>4</sub>.<sup>6</sup> It is noted that despite the fact that K<sub>2</sub>WO<sub>4</sub> is *not* isostructural to (I), (II), and (NH<sub>4</sub>)<sub>2</sub>WSe<sub>4</sub>, its crystal structure ( $C2/m$ ) is very similar to those structures, i.e., with two nonequivalent oxygens (O(2) and O(3)) positioned on a mirror plane and two equivalent oxygens (O(1)) outside this plane for the WO<sub>4</sub><sup>2-</sup> ion.<sup>7</sup> This structure is also reflected by its <sup>17</sup>O MAS NMR spectrum,<sup>6</sup> which shows an appearance similar to those for the <sup>33</sup>S and <sup>77</sup>Se spectra of the ammonium WS<sub>4</sub><sup>2-</sup> and WSe<sub>4</sub><sup>2-</sup> salts, respectively. The <sup>17</sup>O principal axis components reported for the three <sup>17</sup>O chemical shift tensors<sup>6</sup> have been converted to the ( $\delta_{\sigma}$ ,  $\eta_{\sigma}$ ,  $\delta_{\text{iso}}$ ) representation (Table 1), similar to the <sup>77</sup>Se chemical shift data, and are arranged in Table 1 (Supporting Information) according to the same order for  $\delta_{\text{iso}}$ (<sup>17</sup>O) as observed for  $\delta_{\text{iso}}$ (<sup>33</sup>S) and  $\delta_{\text{iso}}$ (<sup>77</sup>Se), and the oxygens then numbered similar to S and Se atoms; (it is noted that this numbering does not correspond to that used for the crystal structure of K<sub>2</sub>WO<sub>4</sub>.<sup>7</sup> The trend observed for the <sup>17</sup>O parameters in Table 1 generally conform to the discussion above for the <sup>33</sup>S and <sup>77</sup>Se parameters. In particular, the magnitudes observed for  $\delta_{\sigma}$ (<sup>17</sup>O) follow the order  $\delta_{\sigma}$ (<sup>17</sup>O) <  $\delta_{\sigma}$ (<sup>33</sup>S) <  $\delta_{\sigma}$ (<sup>77</sup>Se) in accordance with the heavy-atom effect observed above for  $\delta_{\sigma}$ (<sup>33</sup>S) and  $\delta_{\sigma}$ (<sup>77</sup>Se) in the WS<sub>4</sub><sup>2-</sup> and WSe<sub>4</sub><sup>2-</sup> ions. However, since the three sets of  $\delta_{\sigma}$ (<sup>17</sup>O) and  $\eta_{\sigma}$ (<sup>17</sup>O) values for the three nonequivalent oxygens are quite similar it is noted that the precision of these data is most likely somewhat lower compared to the other data in Table 1 as a result of the method used at that



time for extraction of the chemical shift anisotropies (the method of Herzfeld and Berger<sup>8</sup>).<sup>6</sup> Although the data for  $K_2WO_4$  represent the first reported example of  $^{17}O$  chemical shift anisotropies it is unfortunate that in this very early study<sup>6</sup> it was not possible to determine the magnitudes of the small  $^{17}O$  quadrupole coupling parameters ( $C_Q$ ,  $\eta_Q$ ) for the three  $^{17}O$  sites in  $K_2WO_4$ . Clearly it would have been of interest to compare these parameters with the  $^{33}S$  quadrupole coupling data determined in the present study for the corresponding  $WS_4^{2-}$  ions.

## References

- 1 B. R. Srinivasan, C. Näther and W. Bensch, *Acta Cryst.* 2008, **E64**, m296.
- 2 B. R. Srinivasan, M. Poisot, C. Näther and W. Bensch, *Acta Cryst.* 2004, **E60**, i136.
- 3 B. A. Demko, K. Eichele and R. E. Wasylshen, *J. Phys. Chem. A*, 2006, **110**, 13537.
- 4 A. Müller, B. Krebs and H. Beyer, *Z. Naturforsch.* 1968, **23B**, 1537.
- 5 H. J. Jakobsen, A. R. Hove, H. Bildsøe, J. Skibsted and M. Brorson, *Chem. Commun.* **2007**, 1629.
- 6 S. Schramm and E. Oldfield, *J. Am. Chem. Soc.* 1984, **106**, 2502.
- 7 A. S. Koster, F. X. N. M. Kools and G. D. Rieck, *Acta Cryst.* 1969, **B25**, 1704.
- 8 J. Herzfeld and A. E. Berger, *J. Chem. Phys.* 1980, **73**, 6021.
